# Supplementary material for: Nighttime Bracing or Exercise in Moderate-Grade Adolescent Idiopathic Scoliosis: A Randomized Clinical Trial
Source: PubMed Central journal article supplement (PMC10825714; doi:10.1001/jamanetworkopen.2023.52492), 2024-01-29
Supplement: jamanetwopen-e2352492-s002.pdf [file jamanetwopen-e2352492-s002.pdf]

## Supplemental Online Content

Charalampidis A, Diarbakerli, E, Dufvenberg M, et al; CONTRAIS Study Group. Effects of nighttime bracing or exercise in moderate-grade adolescent idiopathic scoliosis: a randomized clinical trial. *JAMA Netw Open*. 2024;7(1):e2352492. doi:10.1001/jamanetworkopen.2023.52492

**eTable 1.** Causal Survival Analysis for Nighttime Bracing Compared With Self-Mediated Physical Activity

**eTable 2.** Causal Survival Analysis for Scoliosis-Specific Exercise Compared With Self-Mediated Physical Activity

This supplemental material has been provided by the authors to give readers additional information about their work.

**eTable 1.** Causal Survival Analysis for Nighttime Bracing Compared With Self-Mediated Physical Activity

|                                                                           | <b>Nighttime brace</b>                 | <b>Physical activity</b>               | <b>Pooled logistic regression</b>                 |                                                               |
|---------------------------------------------------------------------------|----------------------------------------|----------------------------------------|---------------------------------------------------|---------------------------------------------------------------|
| Intention-to-Treat analysis <sup>1</sup><br>N=90                          | Probability of 3-year survival* = 0.73 | Probability of 3-year survival* = 0.48 | Log Odds (95% CI)<br>SE<br>HR (95%)<br>p-value    | -1.75 (-2.7 to -0.8)<br>0.47<br>0.17 (0.07 to 0.43)<br><0.001 |
| Intention-to-Treat CACE weighted analysis <sup>2</sup><br>N=90            | Probability of 3-year survival* = 0.74 | Probability of 3-year survival* = 0.47 | Log Odds (95% CI)<br>SE<br>HR (95% CI)<br>p-value | -1.81 (-3.0 to -0.7)<br>0.60<br>0.16 (0.05 to 0.52)<br>0.002  |
| Per-Protocol (complete cases) CACE weighted analysis <sup>2</sup><br>N=80 | Probability of 3-year survival* = 0.77 | Probability of 3-year survival* = 0.44 | Log Odds (95% CI)<br>SE<br>HR (95% CI)<br>p-value | -1.99 (-3.2 to -0.8)<br>0.59<br>0.14 (0.04 to 0.44)<br><0.001 |

\* Survival was defined as skeletal maturity with 6 degrees or less of curve progression.

1 Adjusted for baseline covariates (Age, Risser, Cobb major curve, Sex).

2 Adjusted for baseline covariates (Age, Risser, Cobb major curve, Sex) and inverse probability weighted for post-randomization time-varying covariates (health care professional reported patient treatment adherence, patient reported treatment adherence, patient reported motivation to carry out treatment, patient reported capability to perform treatment).

SE = Standard error, HR= Hazard ratio, CACE= Complier Average Causal Effects, p<0.05 indicates statistical significance.

**eTable 2.** Causal Survival Analysis for Scoliosis-Specific Exercise Compared With Self-Mediated Physical Activity

|                                                                           | <b>Scoliosis-specific exercise</b>     | <b>Physical activity</b>               | <b>Pooled logistic regression</b>                 |                                                            |
|---------------------------------------------------------------------------|----------------------------------------|----------------------------------------|---------------------------------------------------|------------------------------------------------------------|
| Intention-to-Treat analysis <sup>1</sup><br>N=90                          | Probability of 3-year survival* = 0.45 | Probability of 3-year survival* = 0.49 | Log Odds (95% CI)<br>SE<br>HR (95%)<br>p-value    | -0.10 (-0.9 to 0.7)<br>0.39<br>0.91 (0.43 to 1.93)<br>0.80 |
| Intention-to-Treat CACE weighted analysis <sup>1</sup><br>N=90            | Probability of 3-year survival* = 0.54 | Probability of 3-year survival* = 0.49 | Log Odds (95% CI)<br>SE<br>HR (95% CI)<br>p-value | -0.55 (-1.6 to 0.5)<br>0.53<br>0.58 (0.20 to 1.63)<br>0.30 |
| Per-Protocol (complete cases) CACE weighted analysis <sup>1</sup><br>N=80 | Probability of 3-year survival* = 0.52 | Probability of 3-year survival* = 0.47 | Log Odds (95% CI)<br>SE<br>HR (95% CI)<br>p-value | -0.56 (-1.6 to 0.5)<br>0.52<br>0.57 (0.21 to 1.58)<br>0.28 |

\* Survival was defined as skeletal maturity with 6 degrees or less of curve progression.

<sup>1</sup> Adjusted for baseline covariates (Age, Risser, Cobb major curve, Sex).

<sup>2</sup> Adjusted for baseline covariates (Age, Risser, Cobb major curve, Sex) and inverse probability weighted for post-randomization time-varying covariates (health care professional reported patient treatment adherence, patient reported treatment adherence, patient reported motivation to carry out treatment, patient reported capability to perform treatment).

SE = Standard error, HR= Hazard ratio, CACE= Complier Average Causal Effects, p<0.05 indicates statistical significance.
