# Supplementary material for: Nighttime Bracing or Exercise in Moderate-Grade Adolescent Idiopathic Scoliosis: A Randomized Clinical Trial
Source: PubMed Central journal article supplement (PMC10825714; doi:10.1001/jamanetworkopen.2023.52492), 2024-01-29
Supplement: jamanetwopen-e2352492-s003.pdf [file jamanetwopen-e2352492-s003.pdf]

\*First name, last name, and suffix (if applicable) are required and will appear in PubMed.

| <b>*Group Name: CONTRAIS Study Group</b> |                   |                              |                         |                                                                                                 |                                                 |                                                                      |                                                                                                   |
|------------------------------------------|-------------------|------------------------------|-------------------------|-------------------------------------------------------------------------------------------------|-------------------------------------------------|----------------------------------------------------------------------|---------------------------------------------------------------------------------------------------|
| <b>*First Name and Middle Initial(s)</b> | <b>*Last Name</b> | <b>*Suffix (eg, Jr, III)</b> | <b>Academic Degrees</b> | <b>Institution</b>                                                                              | <b>Location (city, state/province, country)</b> | <b>Role or Contribution, eg, chair, principal investigator</b>       | <b>Group (if more than 1 Group listed in the byline) and/or Subgroup (eg, Steering Committee)</b> |
| Birgitta                                 | Öberg             |                              | RPT, PhD                | Department of Health, Medicine and Caring Sciences, Unit of Physiotherapy, Linköping University | Linköping, Sweden                               | Patient recruitment, patient follow-up, data-analysis                |                                                                                                   |
| Hans                                     | Tropp             |                              | MD, PhD                 | Department of Orthopaedics, Linköping University Hospital                                       | Linköping, Sweden                               | Patient recruitment, patient follow-up, data-analysis                |                                                                                                   |
| Anna                                     | Grauers           |                              | MD, PhD                 | Sundsvall and Harnosand County Hospital                                                         | Sundsvall, Sweden                               | Patient recruitment, patient follow-up                               |                                                                                                   |
| Ylva                                     | Bodén             |                              | MD                      | Department of Orthopaedics, Linköping University Hospital                                       | Linköping, Sweden                               | Patient recruitment, patient follow-up                               |                                                                                                   |
| Mats                                     | Hoffsten          |                              | BSc                     | Team Olmed                                                                                      | Stockholm, Sweden                               | Senior Orthotist, responsible for brace introduction and adjustment. |                                                                                                   |
| Per                                      | Näsman            |                              | PhD                     | Center for Safety Research, KTH Royal Institute of Technology                                   | Stockholm, Sweden                               | Statistical analysis                                                 |                                                                                                   |
| Henrik                                   | Hedevik           |                              | MSc                     | Department of Health, Medicine and Caring Sciences, Unit of Physiotherapy, Linköping University | Linköping, Sweden                               | Statistical analysis                                                 |                                                                                                   |
