# Supplementary material for: Nighttime Bracing or Exercise in Moderate-Grade Adolescent Idiopathic Scoliosis: A Randomized Clinical Trial
Source: PubMed Central journal article supplement (PMC10825714; doi:10.1001/jamanetworkopen.2023.52492), 2024-01-29
Supplement: jamanetwopen-e2352492-s004.pdf [file jamanetwopen-e2352492-s004.pdf]

## Data Sharing Statement

Charalampidis. Nighttime Bracing or Exercise in Moderate-Grade Adolescent Idiopathic Scoliosis. *JAMA Netw Open*. Published January 29, 2024.

doi:10.1001/jamanetworkopen.2023.52492

### Data

**Data available:** Yes

**Data types:** Deidentified participant data, Data dictionary

**How to access data:** Deidentified data will be available for sharing by the corresponding author upon reasonable request.

**When available:** With publication

### Supporting Documents

**Document types:** Statistical/analytic code

**How to access documents:** Data will be available for sharing by the corresponding author upon reasonable request.

**When available:** With publication

### Additional Information

**Who can access the data:** researchers whose proposed use of the data has been approved.

**Types of analyses:** Meta-analysis, systematic review

**Mechanisms of data availability:** After approval of a proposal, or with a signed data access agreement.
